# Supplementary material for: A single-walled carbon nanohorn-based miniature glucose/air biofuel cell for harvesting energy from soft drinks
Source: Royal Society of Chemistry journal article supplement (doi:10.1039/c0ee00080a), 2011-01-01
Supplement: c0ee00080a.pdf [file c0ee00080a.pdf]

## Electronic Supplementary Information

### A single-walled carbon nanohorns-based miniature glucose/air biofuel cell harvesting energy from soft drinks

Dan Wen,<sup>a, b</sup> Xiaolong Xu,<sup>a, b</sup> and Shaojun Dong <sup>\*a</sup>

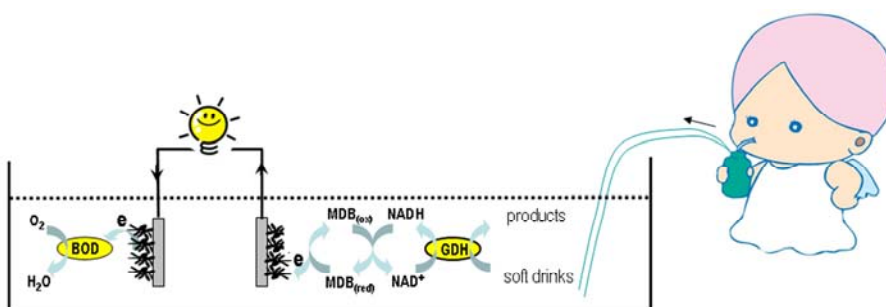

Scheme 1. Schematic illustration of the working principle of the glucose/ $O_2$  BFC harvesting energy from soft drinks.
